# Supplementary material for: Electronic Properties of Graphene Nano-Parallelograms: A Thermally Assisted Occupation DFT Computational Study
Source: MDPI journal article supplement (doi:10.3390/molecules29020349), 2024-01-10
Supplement: s1 [file s1]

## LIST OF TABLES

|    |                                                                                                                                                                                                                                                                               |   |
|----|-------------------------------------------------------------------------------------------------------------------------------------------------------------------------------------------------------------------------------------------------------------------------------|---|
| S1 | Singlet-triplet energy gap $E_{\text{ST}}$ (in kcal/mol) of GNP[ $m,n$ ] ( $m = 1-4$ ), calculated using spin-unrestricted TAO-LDA. ....                                                                                                                                      | 2 |
| S2 | Vertical ionization potential $\text{IP}_v$ (in eV), vertical electron affinity $\text{EA}_v$ (in eV), fundamental gap $E_g$ (in eV), and symmetrized von Neumann entropy $S_{\text{vN}}$ for the ground state of GNP[1, $n$ ], calculated using spin-unrestricted TAO-LDA. . | 3 |
| S3 | Vertical ionization potential $\text{IP}_v$ (in eV), vertical electron affinity $\text{EA}_v$ (in eV), fundamental gap $E_g$ (in eV), and symmetrized von Neumann entropy $S_{\text{vN}}$ for the ground state of GNP[2, $n$ ], calculated using spin-unrestricted TAO-LDA. . | 4 |
| S4 | Vertical ionization potential $\text{IP}_v$ (in eV), vertical electron affinity $\text{EA}_v$ (in eV), fundamental gap $E_g$ (in eV), and symmetrized von Neumann entropy $S_{\text{vN}}$ for the ground state of GNP[3, $n$ ], calculated using spin-unrestricted TAO-LDA. . | 5 |
| S5 | Vertical ionization potential $\text{IP}_v$ (in eV), vertical electron affinity $\text{EA}_v$ (in eV), fundamental gap $E_g$ (in eV), and symmetrized von Neumann entropy $S_{\text{vN}}$ for the ground state of GNP[4, $n$ ], calculated using spin-unrestricted TAO-LDA. . | 6 |

# TABLES

TABLE S1. Singlet-triplet energy gap  $E_{\text{ST}}$  (in kcal/mol) of GNP[ $m,n$ ] ( $m = 1-4$ ), calculated using spin-unrestricted TAO-LDA.

| $n$ | $E_{\text{ST}}$ (GNP[1, $n$ ]) | $E_{\text{ST}}$ (GNP[2, $n$ ]) | $E_{\text{ST}}$ (GNP[3, $n$ ]) | $E_{\text{ST}}$ (GNP[4, $n$ ]) |
|-----|--------------------------------|--------------------------------|--------------------------------|--------------------------------|
| 2   | 64.77                          | 50.08                          | 33.96                          | 22.24                          |
| 3   | 43.21                          | 33.97                          | 23.50                          | 15.38                          |
| 4   | 29.01                          | 22.25                          | 15.38                          | 10.16                          |
| 5   | 19.60                          | 14.64                          | 10.13                          | 6.82                           |
| 6   | 13.55                          | 10.07                          | 7.01                           | 4.84                           |
| 7   | 9.91                           | 7.38                           | 5.17                           | 3.67                           |
| 8   | 7.84                           | 5.71                           | 4.02                           | 2.94                           |
| 9   | 6.66                           | 4.59                           | 3.26                           | 2.45                           |
| 10  | 5.90                           | 3.79                           | 2.75                           | 2.11                           |
| 11  | 5.32                           | 3.22                           | 2.37                           | 1.85                           |
| 12  | 4.82                           | 2.81                           | 2.09                           | 1.65                           |
| 13  | 4.38                           | 2.50                           | 1.86                           | 1.49                           |
| 14  | 3.98                           | 2.26                           | 1.69                           | 1.35                           |
| 15  | 3.65                           | 2.06                           | 1.54                           | 1.25                           |
| 16  | 3.37                           | 1.90                           | 1.42                           | 1.15                           |
| 17  | 3.14                           | 1.76                           | 1.31                           | 1.07                           |
| 18  | 2.94                           | 1.64                           | 1.22                           | 1.00                           |
| 19  | 2.77                           | 1.53                           | 1.14                           | 0.94                           |
| 20  | 2.62                           | 1.44                           | 1.08                           | 0.89                           |
| 21  | 2.49                           | 1.36                           | 1.02                           | 0.84                           |
| 22  | 2.37                           | 1.28                           | 0.96                           | 0.80                           |
| 23  | 2.25                           | 1.22                           | 0.91                           | 0.76                           |
| 24  | 2.15                           | 1.16                           | 0.87                           | 0.73                           |
| 25  | 2.06                           | 1.11                           | 0.83                           | 0.69                           |

|    |      |      |      |      |
|----|------|------|------|------|
| 26 | 1.98 | 1.06 | 0.79 | 0.66 |
| 27 | 1.90 | 1.01 | 0.76 | 0.64 |
| 28 | 1.83 | 0.97 | 0.73 | 0.61 |
| 29 | 1.76 | 0.93 | 0.70 | 0.59 |
| 30 | 1.70 | 0.90 | 0.68 | 0.57 |

TABLE S2. Vertical ionization potential  $IP_v$  (in eV), vertical electron affinity  $EA_v$  (in eV), fundamental gap  $E_g$  (in eV), and symmetrized von Neumann entropy  $S_{vN}$  for the ground state of GNP[1, $n$ ], calculated using spin-unrestricted TAO-LDA.

| $n$ | $IP_v$ | $EA_v$ | $E_g$ | $S_{vN}$ |
|-----|--------|--------|-------|----------|
| 2   | 7.81   | -0.62  | 8.43  | 0.00     |
| 3   | 7.00   | 0.28   | 6.73  | 0.03     |
| 4   | 6.46   | 0.90   | 5.56  | 0.15     |
| 5   | 6.07   | 1.34   | 4.73  | 0.40     |
| 6   | 5.79   | 1.66   | 4.13  | 0.75     |
| 7   | 5.59   | 1.89   | 3.69  | 1.08     |
| 8   | 5.44   | 2.06   | 3.38  | 1.34     |
| 9   | 5.33   | 2.19   | 3.13  | 1.52     |
| 10  | 5.23   | 2.30   | 2.93  | 1.67     |
| 11  | 5.15   | 2.39   | 2.76  | 1.82     |
| 12  | 5.08   | 2.48   | 2.60  | 1.98     |
| 13  | 5.01   | 2.55   | 2.46  | 2.16     |
| 14  | 4.96   | 2.61   | 2.34  | 2.36     |
| 15  | 4.91   | 2.67   | 2.23  | 2.55     |
| 16  | 4.86   | 2.72   | 2.13  | 2.75     |
| 17  | 4.82   | 2.77   | 2.05  | 2.94     |
| 18  | 4.78   | 2.81   | 1.97  | 3.13     |
| 19  | 4.75   | 2.85   | 1.89  | 3.31     |
| 20  | 4.71   | 2.89   | 1.83  | 3.50     |
| 21  | 4.68   | 2.92   | 1.76  | 3.69     |

|    |      |      |      |      |
|----|------|------|------|------|
| 22 | 4.66 | 2.95 | 1.71 | 3.88 |
| 23 | 4.63 | 2.98 | 1.65 | 4.07 |
| 24 | 4.61 | 3.00 | 1.60 | 4.26 |
| 25 | 4.59 | 3.03 | 1.56 | 4.44 |
| 26 | 4.57 | 3.05 | 1.52 | 4.63 |
| 27 | 4.55 | 3.07 | 1.47 | 4.82 |
| 28 | 4.53 | 3.09 | 1.44 | 5.01 |
| 29 | 4.51 | 3.11 | 1.40 | 5.20 |
| 30 | 4.50 | 3.13 | 1.37 | 5.39 |

TABLE S3. Vertical ionization potential  $IP_v$  (in eV), vertical electron affinity  $EA_v$  (in eV), fundamental gap  $E_g$  (in eV), and symmetrized von Neumann entropy  $S_{vN}$  for the ground state of GNP[2, $n$ ], calculated using spin-unrestricted TAO-LDA.

| $n$ | $IP_v$ | $EA_v$ | $E_g$ | $S_{vN}$ |
|-----|--------|--------|-------|----------|
| 2   | 7.05   | 0.19   | 6.86  | 0.02     |
| 3   | 6.45   | 0.89   | 5.57  | 0.09     |
| 4   | 6.02   | 1.40   | 4.62  | 0.32     |
| 5   | 5.72   | 1.76   | 3.96  | 0.67     |
| 6   | 5.51   | 2.01   | 3.50  | 1.04     |
| 7   | 5.37   | 2.19   | 3.17  | 1.36     |
| 8   | 5.25   | 2.33   | 2.92  | 1.64     |
| 9   | 5.16   | 2.45   | 2.71  | 1.93     |
| 10  | 5.08   | 2.54   | 2.53  | 2.23     |
| 11  | 5.01   | 2.62   | 2.38  | 2.53     |
| 12  | 4.95   | 2.69   | 2.26  | 2.82     |
| 13  | 4.90   | 2.76   | 2.14  | 3.10     |
| 14  | 4.85   | 2.81   | 2.04  | 3.38     |
| 15  | 4.81   | 2.86   | 1.95  | 3.67     |
| 16  | 4.78   | 2.90   | 1.87  | 3.95     |
| 17  | 4.74   | 2.94   | 1.80  | 4.23     |

|    |      |      |      |      |
|----|------|------|------|------|
| 18 | 4.71 | 2.98 | 1.73 | 4.52 |
| 19 | 4.69 | 3.01 | 1.67 | 4.80 |
| 20 | 4.66 | 3.04 | 1.62 | 5.09 |
| 21 | 4.64 | 3.07 | 1.56 | 5.37 |
| 22 | 4.61 | 3.10 | 1.52 | 5.65 |
| 23 | 4.59 | 3.12 | 1.47 | 5.94 |
| 24 | 4.57 | 3.14 | 1.43 | 6.22 |
| 25 | 4.56 | 3.17 | 1.39 | 6.51 |
| 26 | 4.54 | 3.19 | 1.35 | 6.79 |
| 27 | 4.52 | 3.20 | 1.32 | 7.07 |
| 28 | 4.51 | 3.22 | 1.29 | 7.36 |
| 29 | 4.49 | 3.24 | 1.25 | 7.64 |
| 30 | 4.48 | 3.25 | 1.23 | 7.93 |

TABLE S4. Vertical ionization potential  $IP_v$  (in eV), vertical electron affinity  $EA_v$  (in eV), fundamental gap  $E_g$  (in eV), and symmetrized von Neumann entropy  $S_{vN}$  for the ground state of GNP[3, $n$ ], calculated using spin-unrestricted TAO-LDA.

| $n$ | $IP_v$ | $EA_v$ | $E_g$ | $S_{vN}$ |
|-----|--------|--------|-------|----------|
| 2   | 6.45   | 0.89   | 5.57  | 0.09     |
| 3   | 6.01   | 1.40   | 4.60  | 0.28     |
| 4   | 5.68   | 1.80   | 3.88  | 0.62     |
| 5   | 5.46   | 2.07   | 3.38  | 1.03     |
| 6   | 5.30   | 2.27   | 3.03  | 1.41     |
| 7   | 5.19   | 2.42   | 2.77  | 1.77     |
| 8   | 5.10   | 2.54   | 2.56  | 2.12     |
| 9   | 5.02   | 2.63   | 2.39  | 2.47     |
| 10  | 4.96   | 2.71   | 2.25  | 2.82     |
| 11  | 4.91   | 2.78   | 2.13  | 3.16     |
| 12  | 4.86   | 2.84   | 2.02  | 3.50     |
| 13  | 4.82   | 2.89   | 1.93  | 3.84     |

|    |      |      |      |      |
|----|------|------|------|------|
| 14 | 4.78 | 2.94 | 1.84 | 4.18 |
| 15 | 4.75 | 2.98 | 1.77 | 4.52 |
| 16 | 4.72 | 3.02 | 1.70 | 4.86 |
| 17 | 4.69 | 3.05 | 1.63 | 5.20 |
| 18 | 4.66 | 3.09 | 1.58 | 5.54 |
| 19 | 4.64 | 3.12 | 1.52 | 5.88 |
| 20 | 4.62 | 3.14 | 1.48 | 6.22 |
| 21 | 4.60 | 3.17 | 1.43 | 6.55 |
| 22 | 4.58 | 3.19 | 1.39 | 6.89 |
| 23 | 4.56 | 3.21 | 1.35 | 7.23 |
| 24 | 4.54 | 3.23 | 1.31 | 7.57 |
| 25 | 4.53 | 3.25 | 1.28 | 7.91 |
| 26 | 4.51 | 3.27 | 1.24 | 8.25 |
| 27 | 4.50 | 3.29 | 1.21 | 8.58 |
| 28 | 4.49 | 3.30 | 1.18 | 8.92 |
| 29 | 4.48 | 3.32 | 1.16 | 9.26 |
| 30 | 4.46 | 3.33 | 1.13 | 9.60 |

TABLE S5. Vertical ionization potential  $IP_v$  (in eV), vertical electron affinity  $EA_v$  (in eV), fundamental gap  $E_g$  (in eV), and symmetrized von Neumann entropy  $S_{vN}$  for the ground state of GNP[4, $n$ ], calculated using spin-unrestricted TAO-LDA.

| $n$ | $IP_v$ | $EA_v$ | $E_g$ | $S_{vN}$ |
|-----|--------|--------|-------|----------|
| 2   | 6.02   | 1.40   | 4.62  | 0.32     |
| 3   | 5.68   | 1.80   | 3.88  | 0.62     |
| 4   | 5.44   | 2.10   | 3.34  | 1.03     |
| 5   | 5.27   | 2.31   | 2.96  | 1.46     |
| 6   | 5.15   | 2.47   | 2.69  | 1.88     |
| 7   | 5.06   | 2.59   | 2.48  | 2.28     |
| 8   | 4.99   | 2.68   | 2.31  | 2.68     |
| 9   | 4.93   | 2.76   | 2.17  | 3.06     |

|    |      |      |      |       |
|----|------|------|------|-------|
| 10 | 4.88 | 2.83 | 2.05 | 3.44  |
| 11 | 4.83 | 2.89 | 1.94 | 3.82  |
| 12 | 4.79 | 2.95 | 1.85 | 4.20  |
| 13 | 4.76 | 2.99 | 1.77 | 4.58  |
| 14 | 4.73 | 3.03 | 1.69 | 4.96  |
| 15 | 4.70 | 3.07 | 1.63 | 5.33  |
| 16 | 4.67 | 3.11 | 1.57 | 5.71  |
| 17 | 4.65 | 3.14 | 1.51 | 6.09  |
| 18 | 4.63 | 3.17 | 1.46 | 6.46  |
| 19 | 4.61 | 3.19 | 1.41 | 6.84  |
| 20 | 4.59 | 3.22 | 1.37 | 7.21  |
| 21 | 4.57 | 3.24 | 1.33 | 7.59  |
| 22 | 4.55 | 3.26 | 1.29 | 7.96  |
| 23 | 4.54 | 3.28 | 1.26 | 8.34  |
| 24 | 4.52 | 3.30 | 1.22 | 8.72  |
| 25 | 4.51 | 3.32 | 1.19 | 9.09  |
| 26 | 4.50 | 3.33 | 1.16 | 9.47  |
| 27 | 4.48 | 3.35 | 1.13 | 9.84  |
| 28 | 4.47 | 3.36 | 1.11 | 10.22 |
| 29 | 4.46 | 3.38 | 1.08 | 10.59 |
| 30 | 4.45 | 3.39 | 1.06 | 10.97 |
